# Supplementary material for: A refined technique for extraction of extracellular matrices from bacterial biofilms and its applicability
Source: PubMed Central journal article supplement (PMC4408173; doi:10.1111/1751-7915.12155), 2014-08-23

# Chiba and Sugimoto *et al.* Figure S1

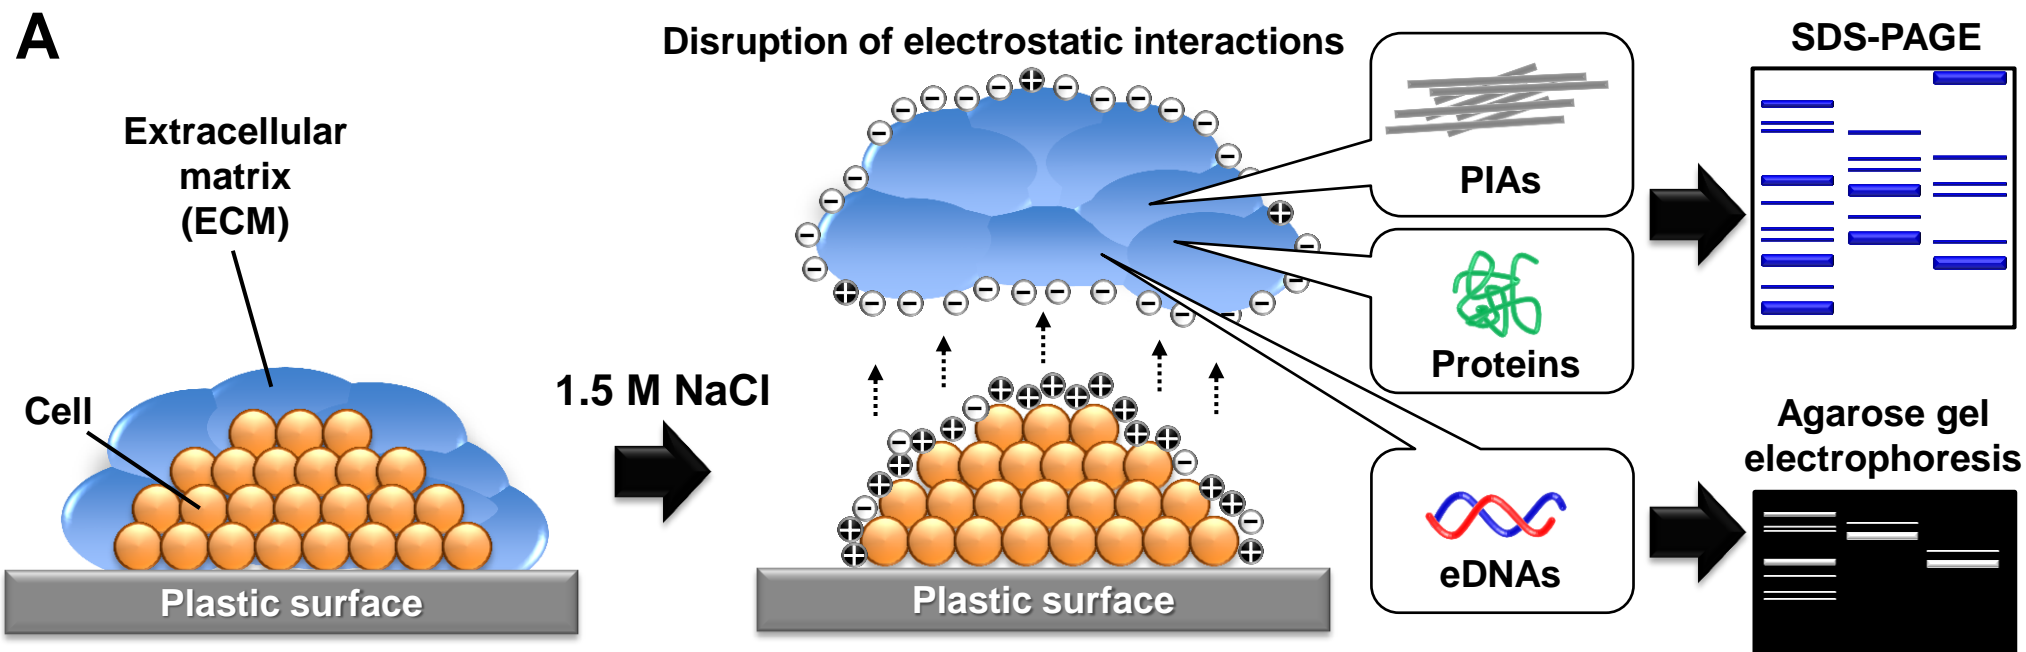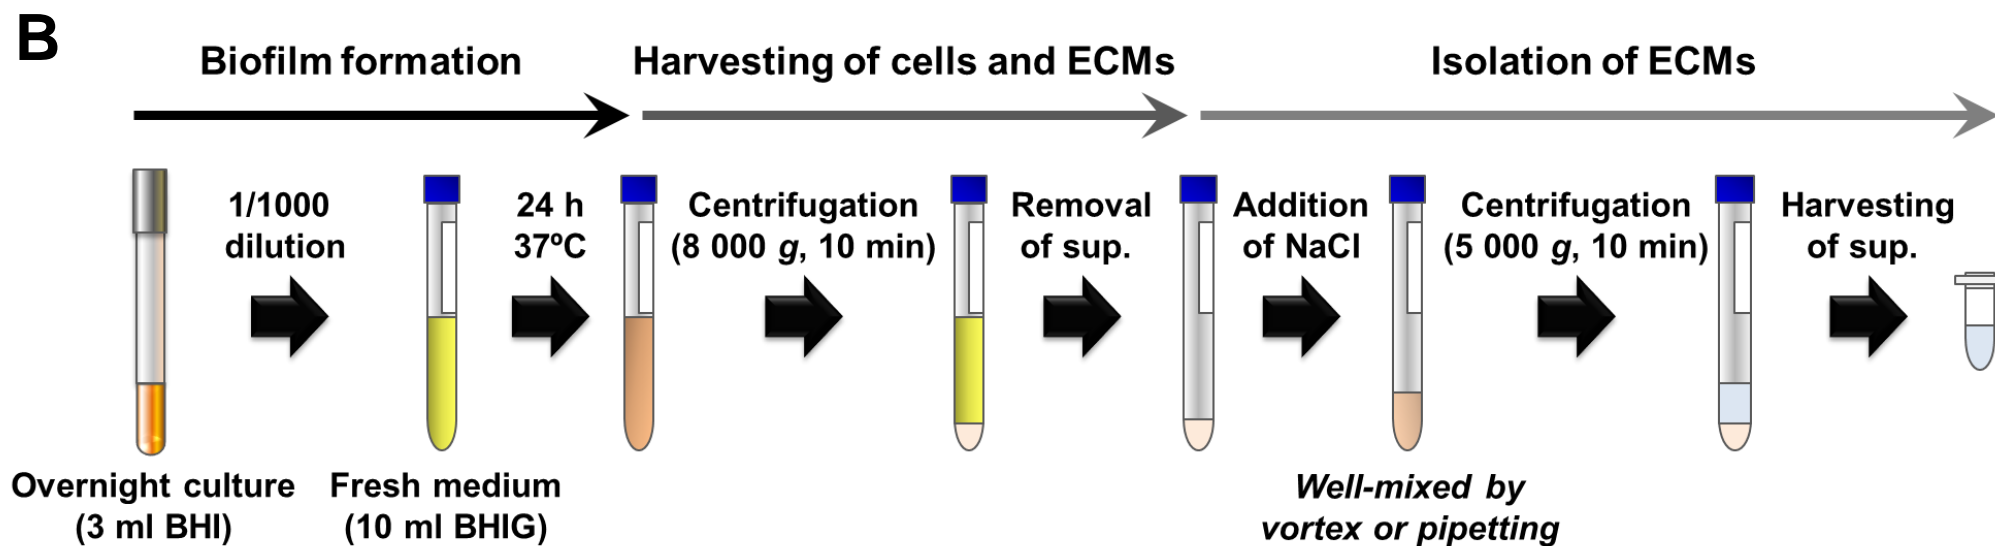

# Chiba and Sugimoto *et al.* Figure S2

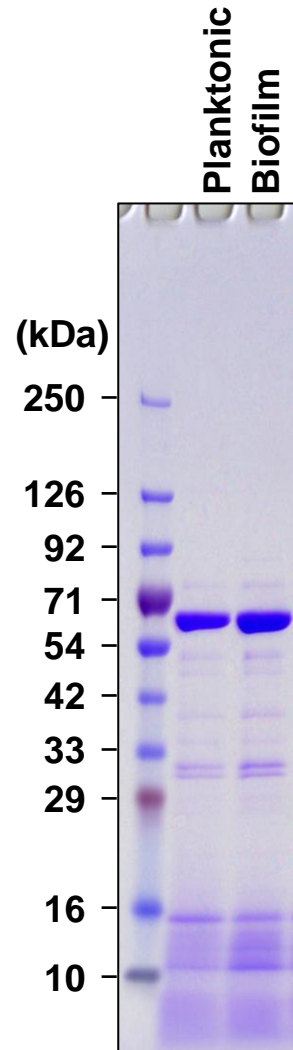

# Chiba and Sugimoto *et al.* Figure S3

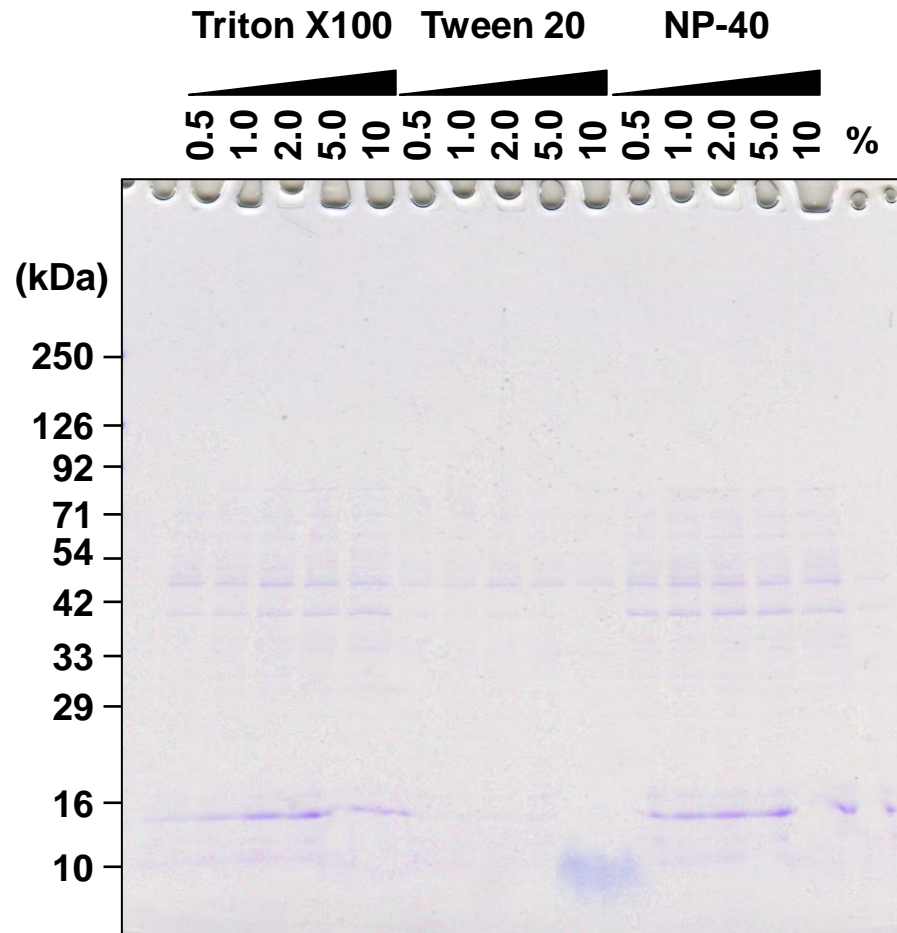

# Chiba and Sugimoto *et al.* Figure S4

**A**

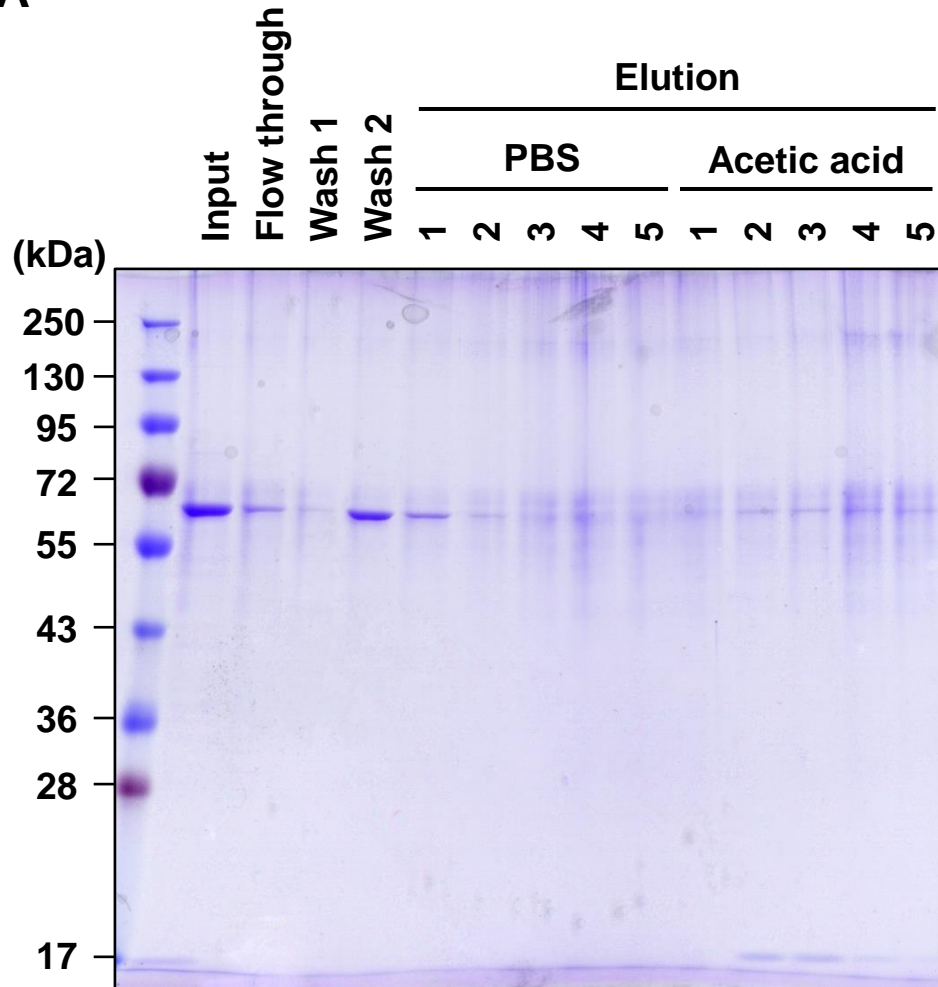

**B**

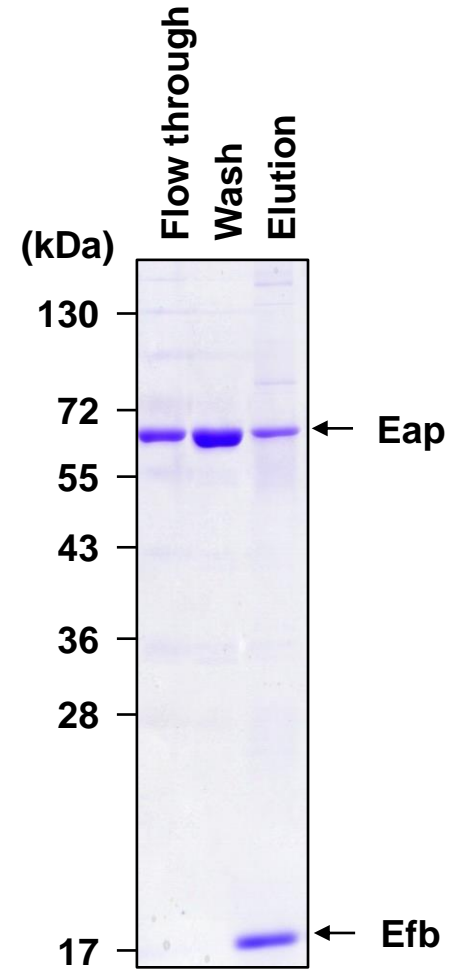

# Chiba and Sugimoto *et al.* Figure S5

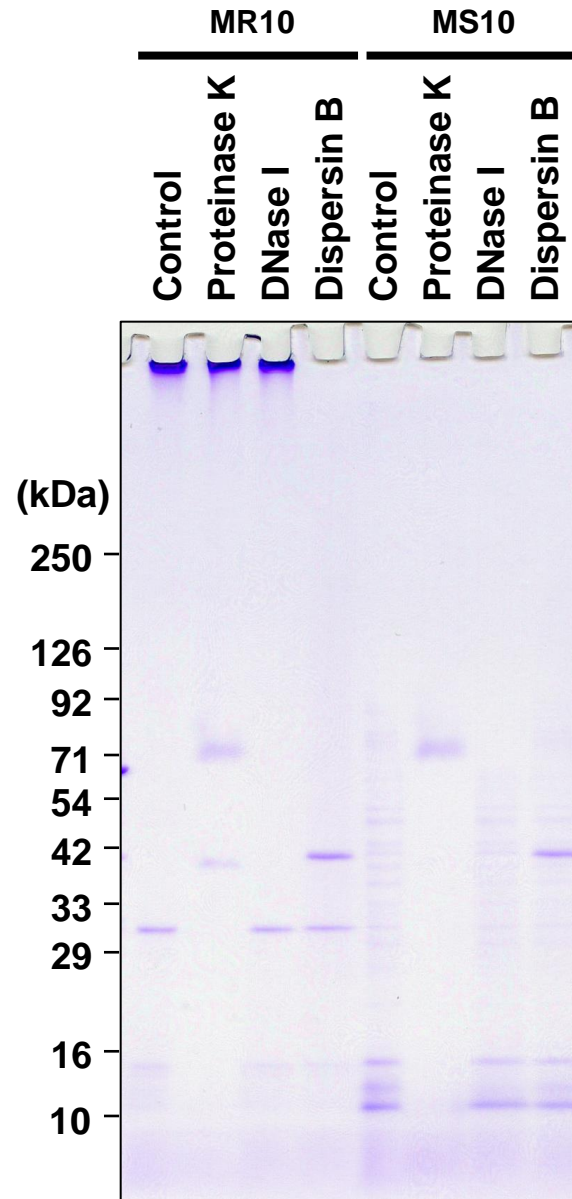

# Chiba and Sugimoto *et al.* Figure S6

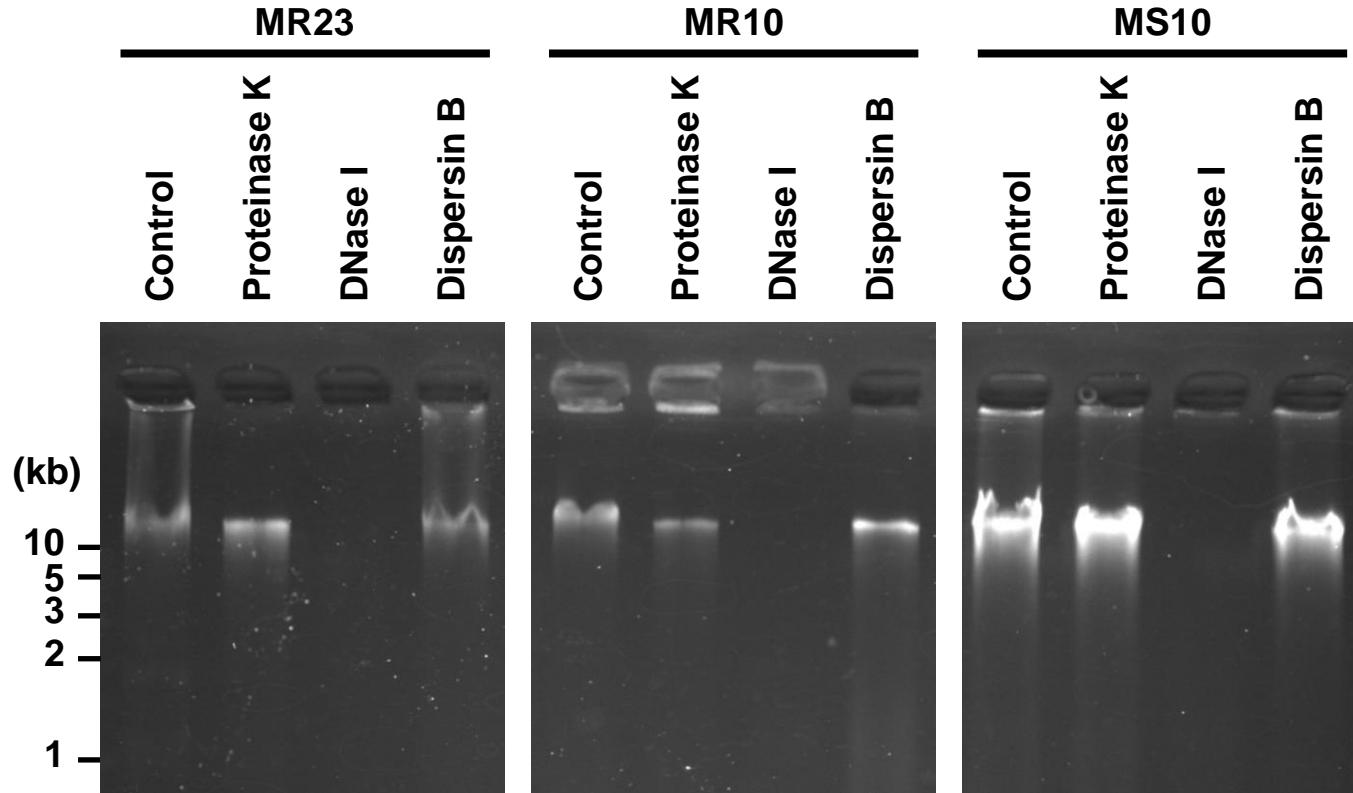

# Chiba and Sugimoto *et al.* Figure S7

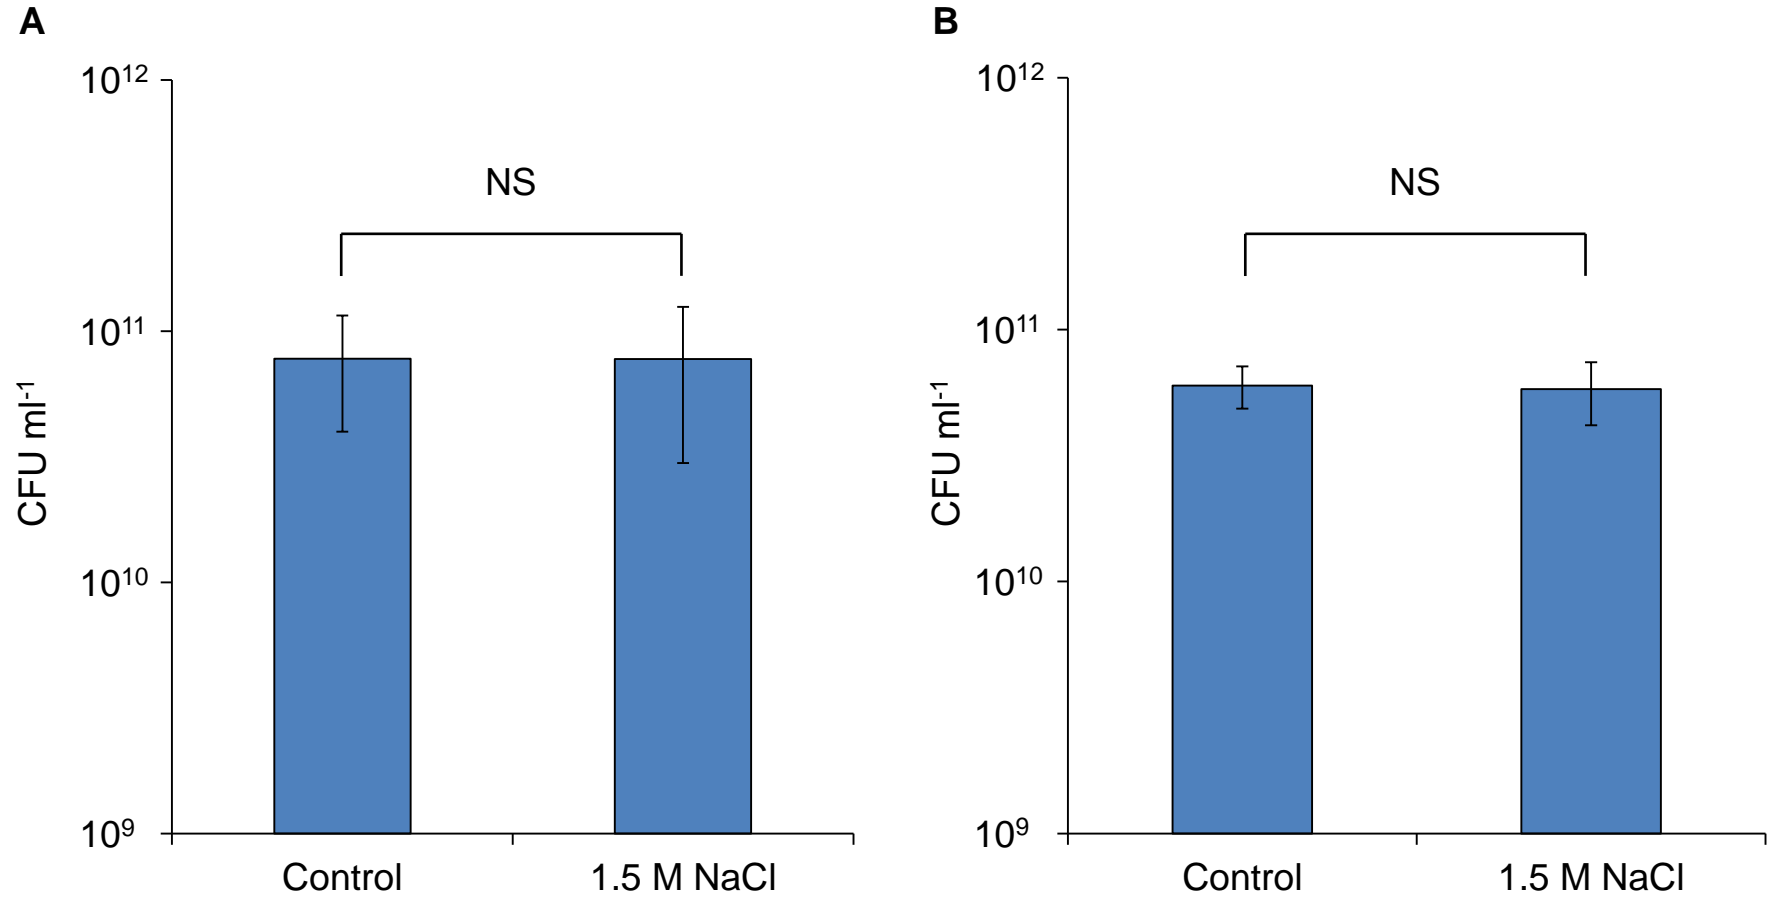

Supplement: mbt20008-0392-sd1.pdf [file mbt20008-0392-sd1.pdf]
