# Supplementary material for: A refined technique for extraction of extracellular matrices from bacterial biofilms and its applicability
Source: PubMed Central journal article supplement (PMC4408173; doi:10.1111/1751-7915.12155), 2014-08-23
Supplement: mbt20008-0392-sd2.pdf [file mbt20008-0392-sd2.pdf]

# Chiba and Sugimoto *et al.* Table S1

**Table S1. Bacterial strains and plasmids used in this study.**

| Strains and plasmids          | Description <sup>1</sup>                                                                                                                                  | Source and reference             |
|-------------------------------|-----------------------------------------------------------------------------------------------------------------------------------------------------------|----------------------------------|
| <i>S. aureus</i> strains      |                                                                                                                                                           |                                  |
| RN4220                        | Restriction deficient derivative of 8325-4 for using sub-cloning host.                                                                                    | Kreiswirth <i>et al.</i> , 1983  |
| MR10                          | A clinical isolate of MRSA from the Jikei hospital, the biofilm was destructed by Dispersin B                                                             | Sato <i>et al.</i> , unpublished |
| MS10                          | A clinical isolate of MSSA from the Jikei hospital, the biofilm was destructed by DNase I                                                                 | Sato <i>et al.</i> , unpublished |
| MR23                          | A clinical isolate of MRSA from the Jikei hospital, the biofilm was destructed by Proteinase K                                                            | Sugimoto <i>et al.</i> , 2013    |
| MR23 pP1GFP                   | MR23 transformed with pP1GFP, Nm <sup>R</sup>                                                                                                             | Sugimoto <i>et al.</i> , 2013    |
| MR23 $\Delta$ <i>srtA</i>     | The <i>srtA</i> gene was deleted from MR23                                                                                                                | This study                       |
| <i>S. epidermidis</i> strains |                                                                                                                                                           |                                  |
| SE04                          | Clinical isolate from the Jikei hospital, the biofilm was destructed by Dispersin B                                                                       | Sato <i>et al.</i> , unpublished |
| <i>P. aeruginosa</i> strains  |                                                                                                                                                           |                                  |
| PAO1                          | The biofilm of this strain was contained eDNA.                                                                                                            | Whitchurch <i>et al.</i> , 2002  |
| <i>E. coli</i> strains        |                                                                                                                                                           |                                  |
| DH5 $\alpha$                  | <i>fhuA2</i> $\Delta$ ( <i>argF-lacZ</i> ) <i>U169 phoA glnV44</i> $\Phi$ 80 $\Delta$ ( <i>lacZ</i> ) <i>M15 gyrA96 recA1 relA1 endA1 thi-1 hsdR17</i>    | Toyobo (Osaka, Japan)            |
| YMe1                          | A derivative of K-12 strain, high level production of curli                                                                                               | Maeyama <i>et al.</i> , 2004     |
| YMe1-1                        | The <i>csgA</i> gene was deleted from YMe1                                                                                                                | Maeyama <i>et al.</i> , 2004     |
| Plasmid                       |                                                                                                                                                           |                                  |
| pP1GFP                        | A plasmid for intracellular expression of GFP <sub>uv</sub> , Nm <sup>R</sup>                                                                             | Sugimoto <i>et al.</i> , 2013    |
| pKOR1                         | An <i>E. coli</i> / <i>S. aureus</i> shuttle vector plasmid for knock out of staphylococcal genes by allelic exchange, Cm <sup>R</sup> , Amp <sup>R</sup> | Bae and Schneewind, 2006         |
| pKOR1- $\Delta$ <i>srtA</i>   | A pKOR1-derivative plasmid for knock out of the MR23 <i>srtA</i> gene, Cm <sup>R</sup> , Amp <sup>R</sup>                                                 | This study                       |

<sup>1</sup> Amp<sup>R</sup>: Ampicillin resistance; Cm<sup>R</sup>: Chloramphenicol resistance; Nm<sup>R</sup>: Neomycin resistance.
